# Supplementary material for: Salt and osmotic stress can improve the editing efficiency of CRISPR/Cas9-mediated genome editing system in potato
Source: PeerJ. 2023 Jul 31;11:e15771. doi: 10.7717/peerj.15771 (PMC10399558; doi:10.7717/peerj.15771)
Supplement: Supplemental Information 1 — *Wild type (WT) genomic sequences and SgRNA provided for comparison. sgRNA sequence is underlined. PAM sequence is surrounded by green boxes. The bold C indicates the roots regeneration under no stress. The number associated with bold M indicates the concentration of mannitol (mM). The number associated with bold N indicates the concentration of sodium chloride (mM). All sequences are followed by a description for the mutation type: i = insertion, r = replacement and d = deletion. The number associated with i, r, and d indicates the number of base pair changes. Insertion and replacement are shown in red letter (G, A, C, T), and deletion are indicated by a red “-”. [file peerj-11-15771-s001.xlsx]

## Sheet: Sheet1
Supplemental table S1.
Types of CRISPR/cas9‐induced mutations identified in regeneration roots.
Lines	target sequence	Mutation type
C-1	AAGTAATGGGTTTTTGGGATTACCCGTTTGTGGCCAAGAAAAAGCCCGGTAGAGACCCGAGAAG	WT
	AAGTAATGGGTTTTTGGGATTACCCGTTT--------------GCCCGGTAGAGACCCGAGAAG	d14 (2/5)
	AAGTAATGGGTTTTTGGGATTACCCGTTTGTGGCCAAGA----GCCCGGTAGAGACCCGAGAAG	d4 (1/5)
	AAGTAATGGGTTTTTGGGATTACCCGTTTGTGGCCAAGAAAA-GCCCGGTAGAGACCCGAGAAG	d1 (2/5)
C-2	AAGTAATGGGTTTTTGGGATTACCCGTTTGTGGCCAAGAAAAAGCCCGGTAGAGACCCGAGAAG	WT
	AAGTAATGGGTTTTTGGGATTACCCGTTTGTGGCCAAG-----GCCCGGTAGAGACCCGAGAAG	d5 (1/7)
	AAGTAATGGGTTTTTGGGATTACCCGTTTGTGGCCAAGAA--AGCCCGGTAGAGACCCGAGAAG	d2 (1/7)
	AAGTAATGGGTTTTTGGGATTACCCGTTTGTGGCCAAGAAA-AGCCCGGTAGAGACCCGAGAAG	d1 (4/7)
	AAGTAATGGGTTTTTGGGATTACCCGTTTGTGGCCAAGAAAAAGCCCGGTAGAGACCCGAGAAG	0 (1/7)
C-3	AAGTAATGGGTTTTTGGGATTACCCGTTTGTGGCCAAGAAAA-AGCCCGGTAGAGACCCGAGAA	WT
	AAGTAATGGGTTTTTGGGATTACCCGTTTGTGGCCAAG-----AGCCCGGTAGAGACCCGAGAA	d4 (1/7)
	AAGTAATGGGTTTTTGGGATTACCCGTTTGTGGCCAAG----AAGCCCGGTAGAGACCCGAGAA	d3 (4/7)
	AAGTAATGGGTTTTTGGGATTACCCGTTTGTGGCCAAGAAAAAAGCCCGGTAGAGACCCGAGAA	i1 (1/7)
	AAGTAATGGGTTTTTGGGATTACCCGTTTGTGGCCAAGAAA-AAGCCCGGTAGAGACCCGAGAA	0 (1/7)
C-4	AAGTAATGGGTTTTTGGGATTACCCGTTTGTGGCCAAGAAAA-AGCCCGGTAGAGACCCGAGAA	WT
	AAGTAATGGGTTTTTGGGATTACCCGTTTGTGGCCAAGAA----GCCCGGTAGAGACCCGAGAA	d3 (1/6)
	AAGTAATGGGTTTTTGGGATTACCCGTTTGTGGCCAAGAAAAAAGCCCGGTAGAGACCCGAGAA	i1 (1/6)
	AAGTAATGGGTTTTTGGGATTACCCGTTTGTGGCCAAGAAAA-AGCCCGGTAGAGACCCGAGAA	0 (4/6)
C-6	AAGTAATGGGTTTTTGGGATTACCCGTTTGTGGCCAAGAA-AAAGCCCGGTAGAGACCCGAGAA	WT
	AAGTAATGGGTTTTTGGGATTACCCGTTTGTGGCCAAG----AAGCCCGGTAGAGACCCGAGAA	d3 (2/7)
	AAGTAATGGGTTTTTGGGATTACCCGTTTGTGGCCAAGAA--AAGCCCGGTAGAGACCCGAGAA	d1 (2/7)
	AAGTAATGGGTTTTTGGGATTACCCGTTTGTGGCCAAGAAAAAAGCCCGGTAGAGACCCGAGAA	i1 (3/7)
C8	AAGTAATGGGTTTTTGGGATTACCCGTTTGTGGCCAAGAAA-AAGCCCGGTAGAGACCCGAGAA	WT
	AAGTAATGGGTTTTTGGGATTACCCGTTTGTGGCCAAGA----AGCCCGGTAGAGACCCGAGAA	d3 (3/7)
	AAGTAATGGGTTTTTGGGATTACCCGTTTGTGGCCAAGAAAAAAGCCCGGTAGAGACCCGAGAA	i1 (4/7)
C12	AAGTAATGGGTTTTTGGGATTACCCGTTTGTGGCCAAGAAAAAGCCCGGTAGAGACCCGAGAAG	WT
	AAGTAATGGGTTTTTGGGATTACCCGTTTG--------------CCCGGTAGAGACCCGAGAAG	d14 (1/7)
	AAGTAATGGGTTTTTGGGATTACCCGTTTGTGGCCAAG----AGCCCGGTAGAGACCCGAGAAG	d4 (2/7)
	AAGTAATGGGTTTTTGGGATTACCCGTTTGTGGCCAAGAA-AAGCCCGGTAGAGACCCGAGAAG	d1 (3/7)
	AAGTAATGGGTTTTTGGGATTACCCGTTTGTGGCCAAGAAAAAGCCCGGTAGAGACCCGAGAAG	0 (1/7)
C13	TTTGGGATTACCCGTTTGTGGCCAAGAAAAAGCCCGGTAGAGACCCGAGAAGGTATCCGGGTCA	WT
	TTTGGGATTACCCGT------------------------------------------------A	d48 (2/5)
	TT------TACC-GTTTGTGGCCAAGA--------------GACCCGAGAAGGTATCCGGGTCA	d21 (1/5)
	TTTGGGATTACCCGTTTGTGGCCAAGA---AGCCCGGTAGAGACCCGAGAAGGTATCCGGGTCA	d3 (1/5)
	TTTGGGATTACCCGTTTGTGGCCAAGAAAAAGCCCGGTAGAGACCCGAGAAGGTATCCGGGTCA	0 (1/5)
C15	AAGTAATGGGTTTTTGGGATTACCCGTTTGTGGCCAAGAAAAAGCCCGGTAGAGACCCGAGAAG	WT
	AAGTAATGGGTTTTTGGGATTACCCGTT---------------------------------AAG	d33 (2/5)
	AAGTAATGGGTTTTTGGGATTACCCGTTTGTGGCCAAG-----------------------AAG	d23 (2/5)
	AAGTAATGGGTTTTTGGGATTACCCGTTTGTGGCCAAGAA---GCCCGGTAGAGACCCGAGAAG	d3 (1/5)
C16	CCCCGGGAAGTAATGGGTTTTTGGGATTACCCGTTTGTGGCCAAGAAAAAGCCCGGTAGAGACCCGAGAAGGT	WT
	CCCCGGGAAG-------------------------------------------------------------GT	d61 (3/7)
	C-------------------------------------------------------------CCCGAGAAGGT	d61 (1/7)
	CCCCGGGAAGTAATGGGTTTTGGGGAT---------------------------------------------T	d45 (1/7)
	CCCCGGGAAGTAATGGGTTTTGGGGATT--------------------------------------------T	d44 (1/7)
	CCCCGGGAAGTAATGGGTTTTTGGGATTACCCGTTTGTGGCCAAGAAAAAGCCCGGTAGAGACCCGAGAAGGT	0 (1/7)
C17	AAGTAATGGGTTTTTGGGATTACCCGTTTGTGGCCAAGAAAAAGCCCGGTAGAGACCCGAGAAG	WT
	AAGTAATGGGTTTTTGGGATTACCCGTT----------------CCCGGTAGAGACCCGAGAAG	d16 (1/5)
	AAGTAATGGGTTTTTGGGATTACCCGTTTGTGGCCAAGAA---GCCCGGTAGAGACCCGAGAAG	d3 (1/5)
	AAGTAATGGGTTTTTGGGATTACCCGTTTGTGGCCAAGAAAAAGCCCGGTAGAGACCCGAGAAG	0 (3/5)
C18	AAGTAATGGGTTTTTGGGATTACCCGTTTGTGGCCAAGAA-AAAGCCCGGTAGAGACCCGAGAA	WT
	AAGTAATGGGTTTTTGGGATTACCCGTTTGTGGCCAAGA------------------------A	d23 (1/5)
	AAGTAATGGGTTTTTGGGATTACCCGTTTGTGGCCAAGA-----GCCCGGTAGAGACCCGAGAA	d4 (1/5)
	AAGTAATGGGTTTTTGGGATTACCCGTTTGTGGCCAAGA---AAGCCCGGTAGAGACCCGAGAA	d2 (1/5)
	AAGTAATGGGTTTTTGGGATTACCCGTTTGTGGCCAAGAAAAAAGCCCGGTAGAGACCCGAGAA	i1 (2/5)
C19	AATCGGGAGATTGTTCATTCAAGTCTTTATTCATCTCTTCGTGTTAATCTTCCCCGGGAAGTAATGGGTTTTTGGGATTACCCGTTTGTGGCCAAGAAAAAGCCCGGTAGAGACCCGAG	WT
	A---------------------------------------------------------------------------------------------------------------------G	d117 (1/6)
	AATCGGGAGATTGTTCATTCAAGTCTTTATTCATCTCTTCGTGTTAATCTTCCCCGGGAAGTAATGGGTTTTTGGGATTACCCGTTTGTGGC-----------------------CGAG	d23 (2/6)
	AATCGGGAGATTGTTCATTCAAGTCTTTATTCATCTCTTCGTGTTAATCTTCCCCGGGAAGTAATGGGTTTTTGGGATTACCCGTTTGTGGCCAAGAAAAA-CCCGGTAGAGACCCGAG	d1 (1/6)
	AATCGGGAGATTGTTCATTCAAGTCTTTATTCATCTCTTCGTGTTAATCTTCCCCGGGAAGTAATGGGTTTTTGGGATTACCCGTTTGTGGCCAAGAAAAAGCCCGGTAGAGACCCGAG	0 (2/6)
C21	CCGGGAAGTAATGGGTTTTTGGGATTACCCGTTTGTGGCCAAGAAAAAGCCCGGTAGAGACCCG	WT
	CC-------------------------------------------------------------G	d61 (5/7)
	CCGGGAAGTAATGGGTTTTTGGGATTACCCGTTTGTGGCCAAGAAA-AGCCCGGTAGAGACCCG	d1 (2/7)
C22	TTGGGATTACCCGTTTGTGGCCAAGAAAAAGCCCGGTAGAGACCCGAGAAGGTATCCGGGTCAT	WT
	T--------------------------------------------------------------T	d62 (2/7)
	TTGGGATTACCCGTTT-------------------GTAGAGACCCGAGAAGGTATCCGGGTCAT	d19 (2/7)
	TTGGGATTACCCGTTTGTGGCCAA------GCCCGGTAGAGACCCGAGAAGGTATCCGGGTCAT	d6 (1/7)
	TTGGGATTACCCGTTTGTGGCCAAGAAAA-GCCCGGTAGAGACCCGAGAAGGTATCCGGGTCAT	d1 (2/7)
C23	AAGTAATGGGTTTTTGGGATTACCCGTTTGTGGCCAAGAAAAAGCCCGGTAGAGACCCGAGAAG	WT
	AAGTAATGGGTTTTTGGGATTACCCGTTTGTGGCC--------GCCCGGTAGAGACCCGAGAAG	d8 (1/7)
	AAGTAATGGGTTTTTGGGATTACCCGTTTGTGGCCAAG------CCCGGTAGAGACCCGAGAAG	d6 (1/7)
	AAGTAATGGGTTTTTGGGATTACCCGTTTGTGGCCAAGAA---GCCCGGTAGAGACCCGAGAAG	d3 (2/7)
	AAGTAATGGGTTTTTGGGATTACCCGTTTGTGGCCAAGAA--AGCCCGGTAGAGACCCGAGAAG	d2 (1/7)
	AAGTAATGGGTTTTTGGGATTACCCGTTTGTGGCCAAGAAAAAGCCCGGTAGAGACCCGAGAAG	0 (2/7)
C24	AAGTAATGGGTTTTTGGGATTACCCGTTTGTGGCCAAGAAAA-AGCCCGGTAGAGACCCGAGAA	WT
	AAGTAATGGGTTTTTGGGATTACCC----------------------------------GAGAA	d33 (1/5)
	AAGTAATGGGTTTTTGGGATTACCCGTTTGTGGCCAAGA----AGCCCGGTAGAGACCCGAGAA	d3 (2/5)
	AAGTAATGGGTTTTTGGGATTACCCGTTTGTGGCCAAGAAAAAAGCCCGGTAGAGACCCGAGAA	i1 (1/5)
	AAGTAATGGGTTTTTGGGATTACCCGTTTGTGGCCAAGA-AAAAGCCCGGTAGAGACCCGAGAA	0 (1/5)
C25	AAGTAATGGGTTTTTGGGATTACCCGTTTGTGGCCAAGAA-AAAGCCCGGTAGAGACCCGAGAA	WT
	AAGTAATGGGTTTTTGGGATTACCCGTTTGTGGCCAA-------GCCCGGTAGAGACCCGAGAA	d6 (2/6)
	AAGTAATGGGTTTTTGGGATTACCCGTTTGTGGCCAAGAAGAAAGCCCGGTAGAGACCCGAGAA	i1 (2/6)
	AAGTAATGGGTTTTTGGGATTACCCGTTTGTGGCCAAGAA-AAAGCCCGGTAGAGACCCGAGAA	0 (2/6)
N10-1	AAGTAATGGGTTTTTGGGATTACCCGTTTGTGGCCAAGAAAAAGCCCGGTAGAGACCCGAGAAG	WT
	AAGTAATGGGTTTTTGGGATTACCCGTTTGTGGCCAAGAA--AGCCCGGTAGAGACCCGAGAAG	d2 (2/5)
	AAGTAATGGGTTTTTGGGATTACCCGTTTGTGGCCAAGAAAAAGCCCGGTAGAGACCCGAGAAG	0 (3/5)
N10-2	AGTAATGGGTTTTTGGGATTACCCGTTTGTGGCCAAGA-AAAAGCCCGGTAGAGACCCGAGAAG	WT
	AGTAATGGGTTTTTGGGATTACCCGTTTGTGGCCA--------GCCCGGTAGAGACCCGAGAAG	d7 (1/5)
	AGTAATGGGTTTTTGGGATTACCCGTTTGTGGCCAAG-----AGCCCGGTAGAGACCCGAGAAG	d4 (1/5)
	AGTAATGGGTTTTTGGGATTACCCGTTTGTGGCCAAGA----AGCCCGGTAGAGACCCGAGAAG	d3 (1/5)
	AGTAATGGGTTTTTGGGATTACCCGTTTGTGGCCAAGAAAAAAGCCCGGTAGAGACCCGAGAAG	i1 (1/5)
	AGTAATGGGTTTTTGGGATTACCCGTTTGTGGCCAAGA-AAAAGCCCGGTAGAGACCCGAGAAG	0 (1/5)
N10-3	AGTAATGGGTTTTTGGGATTACCCGTTTGTGGCCAAGAAAAAGCCCGGTAGAGACCCGAGAAGG	WT
	AGTAATGGGTTTTTGGGATTACCCGTTTGTGGCCA-------GCCCGGTAGAGACCCGAGAAGG	d7 (3/5)
	AGTAATGGGTTTTTGGGATTACCCGTTTGTGGCCAAGAA--AGCCCGGTAGAGACCCGAGAAGG	d2 (2/5)
N10-4	AGTAATGGGTTTTTGGGATTACCCGTTTGTGGCCAAGAAAAAGCCCGGTAGAGACCCGAGAAGG	WT
	AGTAATGGGTTTTTGGGATTACCCGTTTGTGGCCAAGAA---GCCCGGTAGAGACCCGAGAAGG	d3 (3/5)
	AGTAATGGGTTTTTGGGATTACCCGTTTGTGGCCAAGAAA--GCCCGGTAGAGACCCGAGAAGG	d2 (1/5)
	AGTAATGGGTTTTTGGGATTACCCGTTTGTGGCCAAGAAAAAGCCCGGTAGAGACCCGAGAAGG	0 (1/5)
N10-5	AGTAATGGGTTTTTGGGATTACCCGTTTGTGGCCAAGAAAA-AGCCCGGTAGAGACCCGAGAAG	WT
	AGTAATGGGTTTTTGGGATTACCCGTTTGTGGCCAAGAAAAAAGCCCGGTAGAGACCCGAGAAG	i1 (5/5)
N10-6	TTTGGGATTACCCGTTGTGGCCAAGAAAAAGCCCGGTAGAGACCCGAGAAGGTATCCGGGTCAT	WT
	TTTGGGATTACCCGTTG----------------------------------------------T	d46 (2/6)
	TTTGGGATTACCCGTTGTGGCCAAG--AAAGCCCGGTAGAGACCCGAGAAGGTATCCGGGTCAT	d2 (4/6)
N10-7	AGTAATGGGTTTTTGGGATTACCCGTTTGTGGCCAAGAA-AAAGCCCGGTAGAGACCCGAGAAG	WT
	AGTAATGGGTTTTTGGGATTACCCGTTTGTGGCCAAGAA----GCCCGGTAGAGACCCGAGAAG	d3 (5/7)
	AGTAATGGGTTTTTGGGATTACCCGTTTGTGGCCAAGAAAAAAGCCCGGTAGAGACCCGAGAAG	i1 (2/7)
N10-8	AATCGGGAGATTGTTCATTCAAGTCTTTATTCATCTCTTCGTGTTAATCTTCCCCGGGAAGTAATGGGTTTTTGGGATTACCCGTTTGTGGCCAAGAAAAAGCCCGGT	WT
	A-------------------------------------------------TCC-------------GGTT-----------------------------------GGT	d97 (2/5)
	AATCGGGAGATTGTTCATTCAAGTCTTTATTCATCTCTTCGTGTTAATCTTCCCCGGGAAGTAATGGGTTTTTGGGATTACCCGTTTGTGGCCAAGAA---GCCCGGT	d3 (2/5)
	AATCGGGAGATTGTTCATTCAAGTCTTTATTCATCTCTTCGTGTTAATCTTCCCCGGGAAGTAATGGGTTTTGGGGATTACCCGTTTGTGGCCAAGAA--AGCCCGGT	d2 (1/5)
N10-9	AGTAATGGGTTTTTGGGATTACCCGTTTGTGGCCAAGAAAAAGCCCGGTAGAGACCCGAGAAGG	WT
	AGTAATGGGTTTTTGGGATTACCC---------------------------------GAGAAGG	d33 (1/5)
	AGTAATGGGTTTTTGGGATTACCCGTTTGTGGG-------------GGTAGAGACCCGAGAAGG	d13 (1/5)
	AGTAATGGGTTTTTGGGATTACCCGTTTGTGGCCAAGAA---GCCCGGTAGAGACCCGAGAAGG	d3 (1/5)
	AGTAATGGGTTTTTGGGATTACCCGTTTGTGGCCAAGAAAAAGCCCGGTAGAGACCCGAGAAGG	0 (2/5)
N10-10	AGTAATGGGTTTTTGGGATTACCCGTTTGTGGCCAAGAAAAAGCCCGGTAGAGACCCGAGAAGG	WT
	AGTAATGGGTTTTTGGGATTACCCGTTTGTGGCCAAGAA---GCCCGGTAGAGACCCGAGAAGG	d3 (3/5)
	AGTAATGGGTTTTTGGGATTACCCGTTTGTGGCCAAGAAAA-GCCCGGTAGAGACCCGAGAAGG	d1 (2/5)
N10-11	AGTAATGGGTTTTTGGGATTACCCGTTTGTGGCCAAGAAA-AAGCCCGGTAGAGACCCGAGAAG	WT
	AGTAATGGGTTTTTGGGATTACCCGTTTGTGGCC---------GCCCGGTAGAGACCCGAGAAG	d8 (2/5)
	AGTAATGGGTTTTTGGGATTACCCGTTTGTGGCCAAGAAAAAAGCCCGGTAGAGACCCGAGAAG	i1 (2/5)
	AGTAATGGGTTTTTGGGATTACCCGTTTGTGGCCAAGAAA-AAGCCCGGTAGAGACCCGAGAAG	0 (1/5)
N10-12	TTTGGGATTACCCGTTTGTGGCCAAGAAAAA-GCCCGGTAGAGACCCGAGAAGGTATCCGGGTCAT	WT
	T----------------------------------------------------------------T	d63 (4/7)
	TTTGGGATTACCCGTTTGTGGCCAAGAAAAAAGCCCGGTAGAGACCCGAGAAGGTATCCGGGTCAT	d1 (3/7)
N10-14	AGTAATGGGTTTTTGGGATTACCCGTTTGTGGCCAAGAA-AAAGCCCGGTAGAGACCCGAGAAG	WT
	AGTAATGGGTTTTTGGGATTACCCGTTTGTGGCCAA----------------------GAGAAG	d21 (1/5)
	AGTAATGGGTTTTTGGGATTACCCGTTTGTGGCCA--------GCCCGGTAGAGACCCGAGAAG	d7 (1/5)
	AGTAATGGGTTTTTGGGATTACCCGTTTGTGGCCAAGAA---AGCCCGGTAGAGACCCGAGAAG	d2 (2/5)
	AGTAATGGGTTTTTGGGATTACCCGTTTGTGGCCAAGAAAAAAGCCCGGTAGAGACCCGAGAAG	i1 (1/5)
N10-15	AGTAATGGGTTTTTGGGATTACCCGTTTGTGGCCAAGAAAAA-GCCCGGTAGAGACCCGAGAAG	WT
	AGTAATGGGTTTTTGGGATTACCCGTTTGTGGCCAAGAAAAA-----GGTAGAGACCCGAGAAG	d4 (2/5)
	AGTAATGGGTTTTTGGGATTACCCGTTTGTGGCCAAGAA----GCCCGGTAGAGACCCGAGAAG	d3 (1/5)
	AGTAATGGGTTTTTGGGATTACCCGTTTGTGGCCAAGAAAAAAGCCCGGTAGAGACCCGAGAAG	i1 (1/5)
	AGTAATGGGTTTTTGGGATTACCCGTTTGTGGCCAAGAAAAA-GCCCGGTAGAGACCCGAGAAG	0 (1/5)
N10-17	TTGGGATTACCCGTTTGTGGCCAAGAAAA-AGCCCGGTAGAGACCCGAGAAGGTATCCGGGTCATG	WT
	T----------------------------------------------------------------G	d63 (1/5)
	TTGGGATTACCCGTTTGTGGCCAAGA-----GCCCGGTAGAGACCCGAGAAGGTATCCGGGTCATG	d4 (1/5)
	TTGGGATTACCCGTTTGTGGCCAAGAAAAAAGCCCGGTAGAGACCCGAGAAGGTATCCGGGTCATG	i1 (2/5)
	TTGGGATTACCCGTTTGTGGCCAAGAAAA-AGCCCGGTAGAGACCCGAGAAGGTATCCGGGTCATG	0 (1/5)
N10-19	AGTAATGGGTTTTTGGGATTACCCGTTTGTGGCCAAGAAAAAGCCCGGTAGAGACCCGAGAAGG	WT
	AGTAATGGGTTTTTGGGATTACCCGTTTGTGGCCAAGA----GCCCGGTAGAGACCCGAGAAGG	d4 (1/5)
	AGTAATGGGTTTTTGGGATTACCCGTTTGTGGCCAAGA---AGCCCGGTAGAGACCCGAGAAGG	d3 (1/5)
	AGTAATGGGTTTTTGGGATTACCCGTTTGTGGCCAAGAAAAAGCCCGGTAGAGACCCGAGAAGG	0 (3/5)
N20-1	TACCCGTTTGTGGCCAAGAAAAAGCCCGGTAGAGACCCGAGAAGGTATCCGGGTCATGGGGAGG	WT
	TACCCGTTTGTG----------------------------------------------GGGAGG	d46 (3/5)
	TACCCGTTTGTGGCCAAGAAA--GCCCGGTAGAGACCCGAGAAGGTATCCGGGTCATGGGGAGG	d2 (2/5)
N20-2	AGTAATGGGTTTTTGGGATTACCCGTTTGTGGCCAAGAAAA-AGCCCGGTAGAGACCCGAGAAG	WT
	AGTAATGGGTTTTTGGGATTACCCGTTTGTGGCC------------CGGTAGAGACCCGAGAAG	d11 (1/5)
	AGTAATGGGTTTTTGGGATTACCCGTTTGTGGCCA--------GCCCGGTAGAGACCCGAGAAG	d7 (1/5)
	AGTAATGGGTTTTTGGGATTACCCGTTTGTGGCCAAGAAAAAAGCCCGGTAGAGACCCGAGAAG	i1 (1/5)
	AGTAATGGGTTTTTGGGATTACCCGTTTGTGGCCAAGAAAA-AGCCCGGTAGAGACCCGAGAAG	0 (2/5)
N20-3	TACCCGTTTGTGGCCAAGAAAAAGCCCGGTAGAGACCCGAGAAGGTATCCGGGTCATGGGGAGG	WT
	TACCCGTTTGTGGCC----------------------------------------ATGGGGAGG	d40 (2/5)
	TACCCGTTTGTGGCCAAGAA-------GGTAGAGACCCGAGAAGGTATCCGGGTCATGGGGAGG	d7 (1/5)
	TACCCGTTTGTGGCCAAGAA---GCCCGGTAGAGACCCGAGAAGGTATCCGGGTCATGGGGAGG	d3 (2/5)
N20-4	AGTAATGGGTTTTTGGGATTACCCGTTTGTGGCCAAGAAA-AAGCCCGGTAGAGACCCGAGAAG	WT
	AGTAATGGGTTTTTGGGATTACCCGTTTGTGGCCAAGAA----GCCCGGTAGAGACCCGAGAAG	d3 (2/5)
	AGTAATGGGTTTTTGGGATTACCCGTTTGTGGCCAAGAAAAAAGCCCGGTAGAGACCCGAGAAG	i1 (3/5)
N20-5	AGTAATGGGTTTTTGGGATTACCCGTTTGTGGCCAAGAAAAAGCCCGGTAGAGACCCGAGAAGG	WT
	AGTAATGGGTTTTTGGGATTACCCGTTTGTGGCCA-----------------------AGAAGG	d23 (1/5)
	AGTAATGGGTTTTTGGGATTACCCGTTTGTG----------------------ACCCGAGAAGG	d22 (1/5)
	AGTAATGGGTTTTTGGGATTACCCGTTTGTGGCCAAG----------------ACCCGAGAAGG	d16 (2/5)
	AGTAATGGGTTTTTGGGATTACCCGTTTGTGGCCAAG------CCCGGTAGAGACCCGAGAAGG	d6 (1/5)
N20-6	AGTAATGGGTTTTTGGGATTACCCGTTTGTGGCCAAGAAAAAGCCCGGTAGAGACCCGAGAAGG	WT
	AGTAATGGGTTTTTGGGATTACCCGTTTGTGGCCAAG----AGCCCGGTAGAGACCCGAGAAGG	d6 (2/5)
	AGTAATGGGTTTTTGGGATTACCCGTTTGTGGCCAAGAAAAAGCCCGGTAGAGACCCGAGAAGG	0 (3/5)
N20-7	TTTGGGATTACCCGTTTGTGGCCAAGAAAAAGCCCGGTAGAGACCCGAGAAGGTATCCGGGTCA	WT
	TTTGGGATTACCCGTTTGTGGCC----------------------------------------A	d40 (2/5)
	TTTGGGATTACCCGTTTGTGGCCAAGAAA--GCCCGGTAGAGACCCGAGAAGGTATCCGGGTCA	d2 (2/5)
	TTTGGGATTACCCGTTTGTGGCCAAGAAAAAGCCCGGTAGAGACCCGAGAAGGTATCCGGGTCA	0 (1/5)
N20-8	ATGGGTTTTTGGGATTACCCGTTTGTGGCCAAGAAAAAGCCCGGTAGAGACCCGAGAAGGTATCC	WT
	A---------------------------------------------------------------C	d63 (2/5)
	ATGGGTTTTTGGGATTACCCGTTTGTGGCCAAGAAA--GCCCGGTAGAGACCCGAGAAGGTATCC	d2 (3/5)
N20-9	AGTAATGGGTTTTTGGGATTACCCGTTTGTGGCCAAGAAAAAGCCCGGTAGAGACCCGAGAAGG	WT
	AGTAATGGGTTTTTGGGATTACCCGTTTGTGG----------GCCCGGTAGAGACCCGAGAAGG	d10 (3/6)
	AGTAATGGGTTTTTGGGATTACCCGTTTGTGGCCAAGAA---GCCCGGTAGAGACCCGAGAAGG	d3 (3/6)
N20-10	GTGGCCAAGAAAAAGCCCGGTAGAGACCCGAGAAGGTATCCGGGTCATGGGGAGGTGTTGAATTATT	WT
	GTGGC-------------------------------------------------------------T	d61 (1/5)
	GTGGCCAAGAAAAA-CCCGGTAGAGACCCGAGAAGGTATCCGGGTCATGGGGAGGTGTTGAATTATT	d1 (2/5)
	GTGGCCAAGAAAAAGCCCGGTAGAGACCCGAGAAGGTATCCGGGTCATGGGGAGGTGTTGAATTATT	0 (2/5)
N20-11	AGTAATGGGTTTTTGGGATTACCCGTTTGTGGCCAAGAAAAAGCCCGGTAGAGACCCGAGAAGG	WT
	AGTAATGGGTTTTTGGGATTACCCGTTTGTGGCCAAG---AAGCCCGGTAGAGACCCGAGAAGG	d3 (4/5)
	AGTAATGGGTTTTTGGGATTACCCGTTTGTGGCCAAGAAAAAGCCCGGTAGAGACCCGAGAAGG	0 (1/5)
N20-12	AGTAATGGGTTTTTGGGATTACCCGTTTGTGGCCAAGAAAAA-GCCCGGTAGAGACCCGAGAAG	WT
	AGTAATGGGTTTTTGGGATTACCCGTTTGTGGCCAAGA------------------------AG	d23 (1/5)
	AGTAATGGGTTTTTGGGATTACCCGTTTGTGGCCAAGAAA---GCCCGGTAGAGACCCGAGAAG	d2 (2/5)
	AGTAATGGGTTTTTGGGATTACCCGTTTGTGGCCAAGAAAAAAGCCCGGTAGAGACCCGAGAAG	i1 (1/5)
	AGTAATGGGTTTTTGGGATTACCCGTTTGTGGCCAAGAAAAA-GCCCGGTAGAGACCCGAGAAG	0 (1/5)
N20-13	AGTAATGGGTTTTTGGGATTACCCGTTTGTGGCCAAGAAAAA-GCCCGGTAGAGACCCGAGAAG	WT
	AGTAATGGGTTTTTGGGATTACCCGTTTGTGGCCAAGAA----GCCCGGTAGAGACCCGAGAAG	d3 (1/5)
	AGTAATGGGTTTTTGGGATTACCCGTTTGTGGCCAAGAAAAAAGCCCGGTAGAGACCCGAGAAG	i1 (1/5)
	AGTAATGGGTTTTTGGGATTACCCGTTTGTGGCCAAGAAAAG-GCCCGGTAGAGACCCGAGAAG	r1 (3/5)
N30-1	AGTAATGGGTTTTTGGGATTACCCGTTTGTGGCCAAGAAAAAGCCCGGTAGAGACCCGAGAAGG	WT
	AGTAATGGGTTTTTGGGATTACCCGTTTGTGGCCAAG-----------------------AAGG	d23 (1/5)
	AGTAATGGGTTTTTGGGATTACCCGTTTGTGGCCAAG------CCCGGTAGAGACCCGAGAAGG	d6 (2/5)
	AGTAATGGGTTTTTGGGATTACCCGTTTGTGGCCAAGAAAAAGCCCGGTAGAGACCCGAGAAGG	0 (2/5)
N30-2	TAATCTTCCCCGGGAAGTAATGGGTTTTTGGGATTACCCGTTTGTGGCCAAG-AAAAAGCCCGGTAGAGACCCGAGAAGGTATCCGGGTC	WT
	T----------------------------------------------------------------------------------------C	d87 (2/5)
	TAATCTTCCCCGGGAAGTAATGGGTTTTTGGGATTACCCGTTTGT----AAG-AAAAA-------AGAGGCCCGAGAAGGTATCCGGGTC	d9 (2/5)
	TAATCTTCCCCGGGAAGTAATGGGTTTTTGGGATTACCCGTTTGTGGCCAAGAAAAAAGCCCGGTAGAGACCCGAGAAGGTATCCGGGTC	i1 (1/5)
N30-3	AGTAATGGGTTTTTGGGATTACCCGTTTGTGGCCAAGAAAAAGCCCGGTAGAGACCCGAGAAGG	WT
	AGTAATGGGTTTTTGGGATTACCCGTTTGTGGCCAAG---AAGCCCGGTAGAGACCCGAGAAGG	d3 (2/5)
	AGTAATGGGTTTTTGGGATTACCCGTTTGTGGCCAAG--AAAGCCCGGTAGAGACCCGAGAAGG	d2 (2/5)
	AGTAATGGGTTTTTGGGATTACCCGTTTGTGGCCAAGAAAAAGCCCGGTAGAGACCCGAGAAGG	0 (1/5)
N30-4	GGGAAGTAATGGGTTTTTGGGATTACCCGTTTGTGGCCAAGAA-AAAGCCCGGTAGAGACCCGA	WT
	GGGAAGTAATGGGTTT-----------------TGGC----------------T------CCGA	d38 (3/7)
	GGGAAGTAATGGGTTTTTGGGATTACCCGTTTGTGGCCAAGAAAAAAGCCCGGTAGAGACCCGA	i1 (3/7)
	GGGAAGTAATGGGTTTTTGGGATTACCCGTTTGTGGCCAAGAA-AAAGCCCGGTAGAGACCCGA	0 (1/7)
N30-5	AGTAATGGGTTTTTGGGATTACCCGTTTGTGGCCAAGAAAA-AGCCCGGTAGAGACCCGAGAAG	WT
	AGTAATGGGTTTTTGGGATTACCCGTTTGTGGCCAA--------CCCGGTAGAGACCCGAGAAG	d7 (1/5)
	AGTAATGGGTTTTTGGGATTACCCGTTTGTGGCCAAGAAA---GCCCGGTAGAGACCCGAGAAG	d3 (2/5)
	AGTAATGGGTTTTTGGGATTACCCGTTTGTGGCCAAGAAAAAAGCCCGGTAGAGACCCGAGAAG	i1 (1/5)
	AGTAATGGGTTTTTGGGATTACCCGTTTGTGGCCAAGAAAA-AGCCCGGTAGAGACCCGAGAAG	0 (1/5)
N30-6	ATGGGTTTTTGGGATTACCCGTTTGTGGCCAAGAAAAAGCCCGGTAGAGACCCGAGAAGGTATCCGGGTCATGGGGAGGTGTTGAATTATTTGAAT	WT
	A----------------------------------------------------------------------------------------------T	d94 (2/7)
	ATGGGTTTTTGGGATTACCCGTTTGTGGCC----------------------------------------ATGGGGAGGTGTTGAATTATTTGAAT	d40 (3/7)
	ATGGGTTTTTGGGATTACCCGTTTGTGGCCAAGA---AGCCCGGTAGAGACCCGAGAAGGTATCCGGGTCATGGGGAGGTGTTGAATTATTTGAAT	d3 (1/7)
	ATGGGTTTTTGGGATTACCCGTTTGTGGCCAAGAAAAAGCCCGGTAGAGACCCGAGAAGGTATCCGGGTCATGGGGAGGTGTTGAATTATTTGAAT	0 (1/7)
N30-7	AGTAATGGGTTTTTGGGATTACCCGTTTGTGGCCAAGAAA--AAGCCCGGTAGAGACCCGAGAA	WT
	AGTAATGGGTTTTTGGGATTACCCGTTTGTGGCCAAGA-----AGCCCGGTAGAGACCCGAGAA	d3 (2/5)
	AGTAATGGGTTTTTGGGATTACCCGTTTGTGGCCAAGAA----AGCCCGGTAGAGACCCGAGAA	d2 (1/5)
	AGTAATGGGTTTTTGGGATTACCCGTTTGTGGCCAAGAAAA-AAGCCCGGTAGAGACCCGAGAA	i1 (1/5)
	AGTAATGGGTTTTTGGGATTACCCGTTTGTGGCCAAGAAAAAAAGCCCGGTAGAGACCCGAGAA	i2 (1/5)
N30-8	AGTAATGGGTTTTTGGGATTACCCGTTTGTGGCCAAGAAA-AAGCCCGGTAGAGACCCGAGAAG	WT
	AGTAATGGGTTTTTGGGATTACCCGTTTGTGGC----------GCCCGGTAGAGACCCGAGAAG	d9 (1/5)
	AGTAATGGGTTTTTGGGATTACCCGTTTGTGGCCAAGAA---AGCCCGGTAGAGACCCGAGAAG	d2 (1/5)
	AGTAATGGGTTTTTGGGATTACCCGTTTGTGGCCAAGAAA--AGCCCGGTAGAGACCCGAGAAG	d1 (1/5)
	AGTAATGGGTTTTTGGGATTACCCGTTTGTGGCCAAGAAAAAAGCCCGGTAGAGACCCGAGAAG	i1 (2/5)
N30-9	AGTAATGGGTTTTTGGGATTACCCGTTTGTGGCCAAGAAAA-AGCCCGGTAGAGACCCGAGAAG	WT
	AGTAATGGGTTTTTGGGATTACCCGTTTGTGGCCAAGAA----GCCCGGTAGAGACCCGAGAAG	d3 (1/6)
	AGTAATGGGTTTTTGGGATTACCCGTTTGTGGCCAAGAAAA--GCCCGGTAGAGACCCGAGAAG	d1 (1/6)
	AGTAATGGGTTTTTGGGATTACCCGTTTGTGGCCAAGAAAAAAGCCCGGTAGAGACCCGAGAAG	i1 (1/6)
	AGTAATGGGTTTTTGGGATTACCCGTTTGTGGCCAAGAAAA-AGCCCGGTAGAGACCCGAGAAG	0 (3/6)
N30-10	AGTAATGGGTTTTTGGGATTACCCGTTTGTGGCCAAGAAAAA-GCCCGGTAGAGACCCGAGAAG	WT
	AGTAATGGGTTTTTGGGATTACCCGTTTGTGGCCAAG-------CCCGGTAGAGACCCGAGAAG	d6 (1/5)
	AGTAATGGGTTTTTGGGATTACCCGTTTGTGGCCAAGAA----GCCCGGTAGAGACCCGAGAAG	d3 (1/5)
	AGTAATGGGTTTTTGGGATTACCCGTTTGTGGCCAAGAAAAAAGCCCGGTAGAGACCCGAGAAG	i1 (2/5)
	AGTAATGGGTTTTTGGGATTACCCGTTTGTGGCCAAGAAAAA-GCCCGGTAGAGACCCGAGAAG	0 (1/5)
N30-11	AGTAATGGGTTTTTGGGATTACCCGTTTGTGGCCAAGAAAAA-GCCCGGTAGAGACCCGAGAAG	WT
	AGTAATGGGTTTTTGGGATTACCC-------------------------TAGAGACCCGAGAAG	d24 (1/5)
	AGTAATGGGTTTTTGGGATTACCCGTTTGTGGCCAAGAAA-----CCGGTAGAGACCCGAGAAG	d4 (1/5)
	AGTAATGGGTTTTTGGGATTACCCGTTTGTGGCCAAGAAAA--GCCCGGTAGAGACCCGAGAAG	d1 (2/5)
	AGTAATGGGTTTTTGGGATTACCCGTTTGTGGCCAAGAAAAAAGCCCGGTAGAGACCCGAGAAG	i1 (1/5)
N30-12	AGTAATGGGTTTTTGGGATTACCCGTTTGTGGCCAAGAAAAAGCCCGGTAGAGACCCGAGAAGG	WT
	AGTAATGGGTTTTTGG------------------------------------GACCCGAGAAGG	d36 (2/5)
	AGTAATGGGTTTTTGGGATTACCCGTTTGTGGC--------AGCCCGGTAGAGACCCGAGAAGG	d8 (1/5)
	AGTAATGGGTTTTTGGGATTACCCGTTTGTGGCCAAG---AAGCCCGGTAGAGACCCGAGAAGG	d3 (1/5)
	AGTAATGGGTTTTTGGGATTACCCGTTTGTGGCCAAGAAAAAGCCCGGTAGAGACCCGAGAAGG	0 (1/5)
N30-13	AGTAATGGGTTTTTGGGATTACCCGTTTGTGGCCAAGAAAAAGCCCGGTAGAGACCCGAGAAGG	WT
	AGTAATGGGTTTTTGGGATTACCCGTTTGTGGCCA-------GCCCGGTAGAGACCCGAGAAGG	d7 (1/5)
	AGTAATGGGTTTTTGGGATTACCCGTTTGTGGCCAA------GCCCGGTAGAGACCCGAGAAGG	d6 (1/5)
	AGTAATGGGTTTTTGGGATTACCCGTTTGTGGCCAAGAA---GCCCGGTAGAGACCCGAGAAGG	d3 (2/5)
	AGTAATGGGTTTTTGGGATTACCCGTTTGTGGCCAAGAAA--GCCCGGTAGAGACCCGAGAAGG	d2 (1/5)
N50-1	AGTAATGGGTTTTTGGGATTACCCGTTTGTGGCCAAGAAAAAGCCCGGTAGAGACCCGAGAAGG	WT
	AGTAATGGGTTTTTGGGATTACCCGTTTGTGG-----------------------CCGAGAAGG	d23 (1/5)
	AGTAATGGGTTTTTGGGATTACCCGTTTGTG-----------GCCCGGTAGAGACCCGAGAAGG	d11 (2/5)
	AGTAATGGGTTTTTGGGATTACCCGTTTGTGGCCAAG---AAGCCCGGTAGAGACCCGAGAAGG	d3 (1/5)
	AGTAATGGGTTTTTGGGATTACCCGTTTGTGGCCAAG-AAAAGCCCGGTAGAGACCCGAGAAGG	d1 (1/5)
N50-2	AGTAATGGGTTTTTGGGATTACCCGTTTGTGGCCAAGAAAAA-GCCCGGTAGAGACCCGAGAAG	WT
	AGTAATGGGTTTTTGGGATTACCCGTTTGTGGCCAAGAA--------GGTAGAGACCCGAGAAG	d7 (1/5)
	AGTAATGGGTTTTTGGGATTACCCGTTTGTGGCCAAGAA----GCCCGGTAGAGACCCGAGAAG	d3 (1/5)
	AGTAATGGGTTTTTGGGATTACCCGTTTGTGGCCAAGAAAAAAGCCCGGTAGAGACCCGAGAAG	i1 (1/5)
	AGTAATGGGTTTTTGGGATTACCCGTTTGTGGCCAAGAAAAA-GCCCGGTAGAGACCCGAGAAG	0 (2/5)
N50-3	AGTAATGGGTTTTTGGGATTACCCGTTTGTGGCCAAGAA-AAAGCCCGGTAGAGACCCGAGAAG	WT
	AGTAATGGGTTTTTGGGATTACCCGTTTGTGGCCAAG-------CCCGGTAGAGACCCGAGAAG	d6 (1/5)
	AGTAATGGGTTTTTGGGATTACCCGTTTGTGGCCAAGAA--AAGCCCGGTAGAGACCCGAGAAG	d1 (1/5)
	AGTAATGGGTTTTTGGGATTACCCGTTTGTGGCCAAGAAAAAAGCCCGGTAGAGACCCGAGAAG	i1 (3/5)
N50-4	AGTAATGGGTTTTTGGGATTACCCGTTTGTGGCCAAGAAAAAGCCCGGTAGAGACCCGAGAAGG	WT
	AGTAATGGGTTTTTGGGATTACCCGTTTGTGGCCA-------GCCCGGTAGAGACCCGAGAAGG	d7 (1/6)
	AGTAATGGGTTTTTGGGATTACCCGTTTGTGGCCAAGA---AGCCCGGTAGAGACCCGAGAAGG	d3 (3/6)
	AGTAATGGGTTTTTGGGATTACCCGTTTGTGGCCAAGAA--AGCCCGGTAGAGACCCGAGAAGG	d2 (2/6)
N50-5	AGTAATGGGTTTTTGGGATTACCCGTTTGTGGCCAAGA-AAAAGCCCGGTAGAGACCCGAGAAG	WT
	AGTAATGGGTTTTTGGGATTACCCGTTTGTGGCCAAGA-----GCCCGGTAGAGACCCGAGAAG	d4 (1/5)
	AGTAATGGGTTTTTGGGATTACCCGTTTGTGGCCAAGA----AGCCCGGTAGAGACCCGAGAAG	d3 (2/5)
	AGTAATGGGTTTTTGGGATTACCCGTTTGTGGCCAAGA--AAAGCCCGGTAGAGACCCGAGAAG	d1 (1/5)
	AGTAATGGGTTTTTGGGATTACCCGTTTGTGGCCAAGAAAAAAGCCCGGTAGAGACCCGAGAAG	i1 (1/5)
N50-6	AGTAATGGGTTTTTGGGATTACCCGTTTGTGGCCAAGAAAA-AGCCCGGTAGAGACCCGAGAAG	WT
	AGTAATGGGTTTTTGGGATTACCCGTTTGTGGCCAAGAAA---GCCCGGTAGAGACCCGAGAAG	d2 (3/5)
	AGTAATGGGTTTTTGGGATTACCCGTTTGTGGCCAAGAAAAAAGCCCGGTAGAGACCCGAGAAG	i1 (1/5)
	AGTAATGGGTTTTTGGGATTACCCGTTTGTGGCCAAGAAA-AAGCCCGGTAGAGACCCGAGAAG	0 (1/5)
N50-7	GTAATGGGTTTTTGGGATTACCCGTTTGTGGCCAAGAAAAAGCCCGGTAGAGACCCGAGAAGGTATCCGGGTCATGGGGAGGT	WT
	G---------------------------------------------------------------------------------T	d81 (2/5)
	GTAATGGGTTTTTGGGATTACCCGTTTGTGGCC-----AAAGCCCGGTAGAGACCCGAGAAGGTATCCGGGTCATGGGGAGGT	d5 (1/5)
	GTAATGGGTTTTTGGGATTACCCGTTTGTGGCCAAGAAA--GCCCGGTAGAGACCCGAGAAGGTATCCGGGTCATGGGGAGGT	d2 (1/5)
	GTAATGGGTTTTTGGGATTACCCGTTTGTGGCCAAGAAAA-GCCCGGTAGAGACCCGAGAAGGTATCCGGGTCATGGGGAGGT	d1 (1/5)
M50-1	ACCCGTTTGTGGCCAAG-AAAAAGCCCGGTAGAGACCCGAGAAGGTATCCGGGTCATGGGGAGG	WT
	ACCCGTTTGTGGCCA-----------------------------------------TGGGGAGG	d40 (1/6)
	ACCCGTTTGTGGCCAA------AGCCCGGTAGAGACCCGAGAAGGTATCCGGGTCATGGGGAGG	d5 (1/6)
	ACCCGTTTGTGGCCAAG----AAGCCCGGTAGAGACCCGAGAAGGTATCCGGGTCATGGGGAGG	d3 (2/6)
	ACCCGTTTGTGGCCAAG--AAAAACCCGGTAGAGACCCGAGAAGGTATCCGGGTCATGGGGAGG	d1 (1/6)
	ACCCGTTTGTGGCCAAGAAAAAAGCCCGGTAGAGACCCGAGAAGGTATCCGGGTCATGGGGAGG	i1 (1/6)
M50-2	TTTGGGATTACCCGTTTGTGGCCAAGAAAAA-GCCCGGTAGAGACCCGAGAAGGTATCCGGGTCAT	WT
	T----------------------------------------------------------------T	d64 (1/6)
	TTTGGGATTACCCGTTTGTGGCCAAGA-----GCCCGGTAGAGACCCGAGAAGGTATCCGGGTCAT	d4 (1/6)
	TTTGGGATTACCCGTTTGTGGCCAAGAAAA--GCCCGGTAGAGACCCGAGAAGGTATCCGGGTCAT	d1 (1/6)
	TTTGGGATTACCCGTTTGTGGCCAAGAAAAAAGCCCGGTAGAGACCCGAGAAGGTATCCGGGTCAT	i1 (3/6)
M50-4	AGTAATGGGTTTTTGGGATTACCCGTTTGTGGCCAAGA-AAAAGCCCGGTAGAGACCCGAGAAG	WT
	AGTAATGGGTTTTTGGGATTACCCGTTTGTG-------------------------CCGAGAAG	d24 (1/7)
	AGTAATGGGTTTTTGGGATTACCCGTTTGTG-------------CCCGGTAGAGACCCGAGAAG	d12 (1/7)
	AGTAATGGGTTTTTGGGATTACCCGTTTGTGGCCA-------AGCCCGGTAGAGACCCGAGAAG	d6 (1/7)
	AGTAATGGGTTTTTGGGATTACCCGTTTGTGGCCAAGAAAAAAGCCCGGTAGAGACCCGAGAAG	i1 (1/7)
	AGTAATGGGTTTTTGGGATTACCCGTTTGTGGCCAAGA-AAAAGCCCGGTAGAGACCCGAGAAG	0 (3/7)
M50-5	AGTAATGGGTTTTTGGGATTACCCGTTTGTGGCCAAGAAA-AAGCCCGGTAGAGACCCGAGAAGG	WT
	AGTAATGGGTTTTTGGGGATTACCCGTTTGTGGCCAAGAAAAAAGCCCGGTAGAGACCCGAGAAG	i1 (1/5)
	AGTAATGGGTTTTTGGGATTACCCGTTTGTGGCCAAGAAA-AAGCCCGGTAGAGACCCGAGAAGG	0 (4/5)
M50-6	AGTAATGGGTTTTTGGGATTACCCGTTTGTGGCCAAGAAAA-AGCCCGGTAGAGACCCGAGAAG	WT
	AGTAATGGGTTTTTGGGATTACCCGTTTGTGGCCAA---------------------------G	d26 (3/6)
	AGTAATGGGTTTTTGGGATTACCCGTTTGTGGCCAAGAAA--AGCCCGGTAGAGACCCGAGAAG	d1 (1/6)
	AGTAATGGGTTTTTGGGATTACCCGTTTGTGGCCAAGAAAAAAGCCCGGTAGAGACCCGAGAAG	i1 (1/6)
	AGTAATGGGTTTTTGGGATTACCCGTTTGTGGCCAAGAAAA-AGCCCGGTAGAGACCCGAGAAG	0 (1/6)
M50-7	AGTAATGGGTTTTTGGGATTACCCGTTTGTGGCCAAGAAAAA--GCCCGGTAGAGACCCGAGAA	WT
	AGTAATGGGTTTTTGGGATTACCCGTTTGTGGCCAAGAAAAAAAGCCCGGTAGAGACCCGAGAA	i2 (3/6)
	AGTAATGGGTTTTTGGGATTACCCGTTTGTGGCCAAGAAAAA-AGCCCGGTAGAGACCCGAGAA	i1 (1/6)
	AGTAATGGGTTTTTGGGATTACCCGTTTGTGGCCAAGAAAAA--GCCCGGTAGAGACCCGAGAA	0 (2/6)
M50-9	GGATTACCCGTTTGTGGCCAAGAAAAAGCCCGGTAGAGACCCGAGAAGGTATCCGGGTCATGGG	WT
	GGATTACCCGTTTGT------------------------------------------------G	d48 (1/6)
	GGATTACCCGTTTGTGGCCA-------GCCCGGTAGAGACCCGAGAAGGTATCCGGGTCATGGG	d7 (1/6)
	GGATTACCCGTTTGTGGCCAAGAAA-AGCCCGGTAGAGACCCGAGAAGGTATCCGGGTCATGGG	d1 (3/6)
	GGATTACCCGTTTGTGGCCAAGAAAAAGCCCGGTAGAGACCCGAGAAGGTATCCGGGTCATGGG	0 (1/6)
M50-10	AGTAATGGGTTTTTGGGATTACCCGTTTGTGGCCAAGAAAAAGCCCGGTAGAGACCCGAGAAGG	WT
	AGTAATGGGTTTTTGGGATTACCCGTTTGTGGCCAAGAA--AGCCCGGTAGAGACCCGAGAAGG	d2 (2/6)
	AGTAATGGGTTTTTGGGATTACCCGTTTGTGGCCAAGAAAAAGCCCGGTAGAGACCCGAGAAGG	0 (4/6)
M50-11	GTTTGTGGCCAAGAAAAAGCCCGGTAGAGACCCGAGAAGGTATCCGGGTCATGGGGAGGTGTTGAATTATTTGAATGATTTTGCTGTTGATT	WT
	G------------------------------------------------------------------------------------------T	d90 (1/5)
	GTTTGTGGCCAAG---AAGCCCGGTAGAGACCCGAGAAGGTATCCGGGTCATGGGGAGGTGTTGAATTATTTGAATGATTTTGCTGTTGATT	d3 (1/5)
	GTTTGTGGCCAAGAAAAAGCCCGGTAGAGACCCGAGAAGGTATCCGGGTCATGGGGAGGTGTTGAATTATTTGAATGATTTTGCTGTTGATT	0 (3/5)
M50-12	TTACCCGTTTGTGGCCAAGAAAAAGCCCGGTAGAGACCCGAGAAGGTATCCGGGTCATGGGGAG	WT
	T------------------------------------------------CCGGGTCATGGGGAG	d48 (2/5)
	TTACCCGTTTGTGGCCAAGA----------TAGAGACCCGAGAAGGTATCCGGGTCATGGGGAG	d10 (2/5)
	TTACCCGTTTGTGGCCAAGA----GCCCGGTAGAGACCCGAGAAGGTATCCGGGTCATGGGGAG	d4 (1/5)
M50-13	AGTAATGGGTTTTTGGGATTACCCGTTTGTGGCCAAGAAAAAGCCCGGTAGAGACCCGAGAAGG	WT
	AGTAATGGGTTTTTGGG------------------------------------ACCCGAGAAGG	d36 (1/6)
	AGTAATGGGTTTTTGGGA-------------------------CCCGGTAGAGACCCGAGAAGG	d25 (2/6)
	AGTAATGGGTTTTTGGGATTACCCGTTTGTGGCCAAGAAAAAGCCCGGTAGAGACCCGAGAAGG	0 (3/6)
M50-14	AGTAATGGGTTTTTGGGATTACCCGTTTGTGGCCAAGAA-AAAGCCCGGTAGAGACCCGAGAAG	WT
	AGTAATGGGTTTTTGGGATTACCCGTTTGTGGCCAAG---AAAGCCCGGTAGAGACCCGAGAAG	d2 (2/5)
	AGTAATGGGTTTTTGGGATTACCCGTTTGTGGCCAAGAAAAAAGCCCGGTAGAGACCCGAGAAG	i1 (3/5)
M50-15	AGTAATGGGTTTTTGGGATTACCCGTTTGTGGCCAAGAA--AAAGCCCGGTAGAGACCCGAGAA	WT
	AGTAATGGGTTTTTGGGATTACCCGTTTGTGGCCA-------------------------AGAA	d23 (1/6)
	AGTAATGGGTTTTTGGGATTACCCGTTTGTGGCCAAGA------GCCCGGTAGAGACCCGAGAA	d4 (1/6)
	AGTAATGGGTTTTTGGGATTACCCGTTTGTGGCCAAGA----AAGCCCGGTAGAGACCCGAGAA	d2 (2/6)
	AGTAATGGGTTTTTGGGATTACCCGTTTGTGGCCAAGAA-AAAAGCCCGGTAGAGACCCGAGAA	i1 (1/6)
	AGTAATGGGTTTTTGGGATTACCCGTTTGTGGCCAAGAAAAAAAGCCCGGTAGAGACCCGAGAA	i2 (1/6)
M50-16	TTTTTGGGATTACCCGTTTGTGGCCAAGAAAAAGCCCGGTAGAGACCCGAGAAGGTATCCGGGT	WT
	TTTTTGGGATTACCCGTTTGTGG---------------------------------------GT	d39 (1/6)
	TTTTTGGGATTACCCGTTTGTGGCC--------GCCCGGTAGAGACCCGAGAAGGTATCCGGGT	d8 (1/6)
	TTTTTGGGATTACCCGTTTGTGGCCAAGAAA-AGCCCGGTAGAGACCCGAGAAGGTATCCGGGT	d1 (2/6)
	TTTTTGGGATTACCCGTTTGTGGCCAAGAAAAAGCCCGGTAGAGACCCGAGAAGGTATCCGGGT	0 (2/6)
M50-17	AGTAATGGGTTTTTGGGATTACCCGTTTGTGGCCAAGAAAAAGCCCGGTAGAGACCCGAGAAGG	WT
	AGTAATGGGTTTTTGGGATTACCCGTTTGTGGCCAAG---AAGCCCGGTAGAGACCCGAGAAGG	d3 (1/5)
	AGTAATGGGTTTTTGGGATTACCCGTTTGTGGCCAAG--AAAGCCCGGTAGAGACCCGAGAAGG	d2 (1/5)
	AGTAATGGGTTTTTGGGATTACCCGTTTGTGGCCAAGA-AAAGCCCGGTAGAGACCCGAGAAGG	d1 (1/5)
	AGTAATGGGTTTTTGGGATTACCCGTTTGTGGCCAAGAAAAAGCCCGGTAGAGACCCGAGAAGG	0 (2/5)
M50-18	AGTAATGGGTTTTTGGGATTACCCGTTTGTGGCCAAGAAAAAGCCCGGTAGAGACCCGAGAAGG	WT
	AGTAATGGGTTTTTGGGATTACCCGTTTGTGGCCAAGA----GCCCGGTAGAGACCCGAGAAGG	d4 (1/6)
	AGTAATGGGTTTTTGGGATTACCCGTTTGTGGCCAAGAA---GCCCGGTAGAGACCCGAGAAGG	d3 (2/6)
	AGTAATGGGTTTTTGGGATTACCCGTTTGTGGCCAAGAAA-AGCCCGGTAGAGACCCGAGAAGG	d1 (1/6)
	AGTAATGGGTTTTTGGGATTACCCGTTTGTGGCCAAGAAAAAGCCCGGTAGAGACCCGAGAAGG	0 (2/6)
M50-19	GTTGGTATCGACCCGAATCGGGAGATTGTTCATTCAAGTCTTTATTCATCTCTTCGTGTTAATCTTCCCCGGGAAGTAATGGGTTTTTGGGATTACCCGTTTGTGGCCAAGA-AAAAGCCCGGTAGAGACCCGAGAAGGTATCCGGGTCATGGGGAGGTGTT	WT
	G---------------------------------------------------------------------------------------------------------------------------------------------------------------T	d158 (2/6)
	GTTGGTATCGACCCGAATCGGGAGATTGTTCATTCAAGTCTTTATTCATCTCTTCGTGTTAATCTTCCCCGGGAAGTAATGGGTTTTTGGGATTACCCGTTTGTGGCCAAG---AAAGCCCGGTAGAGACCCGAGAAGGTATCCGGGTCATGGGGAGGTGTT	d2 (1/6)
	GTTGGTATCGACCCGAATCGGGAGATTGTTCATTCAAGTCTTTATTCATCTCTTCGTGTTAATCTTCCCCGGGAAGTAATGGGTTTTTGGGATTACCCGTTTGTGGCCAAG--AAAAGCCCGGTAGAGACCCGAGAAGGTATCCGGGTCATGGGGAGGTGTT	d1 (2/6)
	GTTGGTATCGACCCGAATCGGGAGATTGTTCATTCAAGTCTTTATTCATCTCTTCGTGTTAATCTTCCCCGGGAAGTAATGGGTTTTTGGGATTACCCGTTTGTGGCCAAGAAAAAAGCCCGGTAGAGACCCGAGAAGGTATCCGGGTCATGGGGAGGTGTT	i1 (1/6)
M50-21	AATCTTCCCCGGGAAGTAATGGGTTTTTGGGATTACCCGTTTGTGGCCAAGAAAAAGCCCGGTAGAGACCCGAGAAGGTATCCGGGTCATGGGGAGG	WT
	AATCTTCCCCGGGAAGTAATGGGTTTT---------------------------------------------------------------GGGGAGG	d63 (1/5)
	AATCTTCCCCGGGAAGTAATGGGTTTTTGGGATTACCCGTTTGTGGCC----------------------CGAGAAGGTATCCGGGTCATGGGGAGG	d22 (2/5)
	AATCTTCCCCGGGAAGTAATGGGTTTTTGGGATTACCCGTTTGTGGCCAA---------------------GAGAAGGTATCCGGGTCATGGGGAGG	d21 (1/5)
	AATCTTCCCCGGGAAGTAATGGGTTTTTGGGATTACCCGTTTGTGGCCAA-----------GTAGAGACCCGAGAAGGTATCCGGGTCATGGGGAGG	d11 (1/5)
M100-1	AGTAATGGGTTTTTGGGATTACCCGTTTGTGGCCAAGAAAAAGCCCGGTAGAGACCCGAGAAGG	WT
	AGTAATGGGTTTTTGGGATTACCCGTTTGTGGCCAAGAAA--GCCCGGTAGAGACCCGAGAAGG	d2 (3/5)
	AGTAATGGGTTTTTGGGATTACCCGTTTGTGGCCAAGAAAAAGCCCGGTAGAGACCCGAGAAGG	0 (2/5)
M100-2	AGTAATGGGTTTTTGGGATTACCCGTTTGTGGCCAAGA-AAAAGCCCGGTAGAGACCCGAGAAG	WT
	AGTAATGGGTTTTTGGGATTACCCGTTTGTGGCCAAG----------GG--GAGACCCGAGAAG	d11 (1/6)
	AGTAATGGGTTTTTGGGATTACCCGTTTGTGGCCAAG-----AGCCCGGTAGAGACCCGAGAAG	d4 (1/6)
	AGTAATGGGTTTTTGGGATTACCCGTTTGTGGCCAAG---AAAGCCCGGTAGAGACCCGAGAAG	d2 (1/6)
	AGTAATGGGTTTTTGGGATTACCCGTTTGTGGCCAAGA--AAAGCCCGGTAGAGACCCGAGAAG	d1 (2/6)
	AGTAATGGGTTTTTGGGATTACCCGTTTGTGGCCAAGAAAAAAGCCCGGTAGAGACCCGAGAAG	i1 (1/6)
M100-3	AGTAATGGGTTTTTGGGATTACCCGTTTGTGGCCAAGAAAAAGCCCGGTAGAGACCCGAGAAGG	WT
	AGTAATGGGTTTTTGGGATTACCCGTTTGTGGCCAAGAA---GCCCGGTAGAGACCCGAGAAGG	d3 (3/6)
	AGTAATGGGTTTTTGGGATTACCCGTTTGTGGCCAAGAAAA-GCCCGGTAGAGACCCGAGAAGG	d1 (3/6)
M100-4	AGTAATGGGTTTTTGGGATTACCCGTTTGTGGCCAAGAAAAAGCCCGGTAGAGACCCGAGAAGG	WT
	AGTAATGGGTTTTTGGGATTACCCGTTTGTGGCCAA----AAGCCCGGTAGAGACCCGAGAAGG	d4 (1/7)
	AGTAATGGGTTTTTGGGATTACCCGTTTGTGGCCAAG--AAAGCCCGGTAGAGACCCGAGAAGG	d2 (4/7)
	AGTAATGGGTTTTTGGGATTACCCGTTTGTGGCCAAGAAAAAGCCCGGTAGAGACCCGAGAAGG	0 (2/7)
M100-5	TTTTGGGATTACCCGTTTGTGGCCAAGAAAAAGCCCGGTAGAGACCCGAGAAGGTATCCGGGTC	WT
	TTTTGGGATTACCCGTTTGTGGC----------------------------------------C	d40 (1/6)
	TTTTGGGATTACCCG---------------------------------AGAAGGTATCCGGGTC	d33 (1/6)
	TTTTGGGATTACCCGTTTGTGGCCAAGA----GCCCGGTAGAGACCCGAGAAGGTATCCGGGTC	d4 (1/6)
	TTTTGGGATTACCCGTTTGTGGCCAAG--AAAGCCCGGTAGAGACCCGAGAAGGTATCCGGGTC	d2 (1/6)
	TTTTGGGATTACCCGTTTGTGGCCAAGAAAAAGCCCGGTAGAGACCCGAGAAGGTATCCGGGTC	0 (2/6)
M100-6	AGTAATGGGTTTTTGGGATTACCCGTTTGTGGCCAAGAAAAAGCCCGGTAGAGACCCGAGAAGG	WT
	AGTAATGGGTTTTTGGGATTACCCGTTTGTGGCCAAG---------------------AGAAGG	d21 (1/5)
	AGTAATGGGTTTTTGGGATTACCCGTTTGTGGCCAAG---AAGCCCGGTAGAGACCCGAGAAGG	d3 (2/5)
	AGTAATGGGTTTTTGGGATTACCCGTTTGTGGCCAAGAAAAAGCCCGGTAGAGACCCGAGAAGG	0 (2/5)
M100-7	TTTTTGGGATTACCCGTTTGTGGCCAAGAAAAAGCCCGGTAGAGACCCGAGAAGGTATCCGGGT	WT
	TTTTTGGGATTACCCGTTTGT----------------------------------------GGT	d40 (1/5)
	TTTTTGGGATTACCCGTTTGTGG-----------------------CCGAGAAGGTATCCGGGT	d23 (1/5)
	TTTTTGGGATTACCCGTTTGTGGCCAAGA-----CCCGGTAGAGACCCGAGAAGGTATCCGGGT	d5 (2/5)
	TTTTTGGGATTACCCGTTTGTGGCCAAGAAAAAGCCCGGTAGAGACCCGAGAAGGTATCCGGGT	0 (1/5)
M100-8	AGTAATGGGTTTTTGGGATTACCCGTTTGTGGCCAAGAAA-AAGCCCGGTAGAGACCCGAGAAG	WT
	AGTAATGGGTTTTTGGGATTACCCGTTTGTGGCCAAG-----AGCCCGGTAGAGACCCGAGAAG	d4 (2/6)
	AGTAATGGGTTTTTGGGATTACCCGTTTGTGGCCAAGAA---AGCCCGGTAGAGACCCGAGAAG	d2 (2/6)
	AGTAATGGGTTTTTGGGATTACCCGTTTGTGGCCAAGAAA--AGCCCGGTAGAGACCCGAGAAG	d1 (1/6)
	AGTAATGGGTTTTTGGGATTACCCGTTTGTGGCCAAGAAAAAAGCCCGGTAGAGACCCGAGAAG	i1 (1/6)
M100-9	CCCGTTTGTGGCCAAG-AAAAAGCCCGGTAGAGACCCGAGAAGGTATCCGGGTCATGGGGAGGT	WT
	CCCGTT---------------------------------------------------------T	d56 (2/6)
	CCCGTTTGTGGCCA-------AGCCCGGTAGAGACCCGAGAAGGTATCCGGGTCATGGGGAGGT	d6 (2/6)
	CCCGTTTGTGGCCAAGAAAAAAGCCCGGTAGAGACCCGAGAAGGTATCCGGGTCATGGGGAGGT	i1 (2/6)
M100-10	AGTAATGGGTTTTTGGGATTACCCGTTTGTGGCCAAGAAAAAGCCCGGTAGAGACCCGAGAAGG	WT
	AGTAATGGGTTTTTGGGATTACCCGTTTGTGGCCA-----------------------AGAAGG	d23 (1/5)
	AGTAATGGGTTTTTGGGATTACCCGTTTGTGGCCAAG--AAAGCCCGGTAGAGACCCGAGAAGG	d2 (2/5)
	AGTAATGGGTTTTTGGGATTACCCGTTTGTGGCCAAGAAAAAGCCCGGTAGAGACCCGAGAAGG	0 (2/5)
M100-11	CCCCGGGAAGTAATGGGTTTTTGGGATTACCCGTTTGTGGCCAAGAAA-AAGCCCGGTAGAGACCCGAGAAGGTAT	WT
	C--------------------------------------------------------------------------T	d73 (2/5)
	CCCCGGGAAGTAATGGGTTTTTGGGATTACCCGTTTGTGGCCAAGAAAAAAGCCCGGTAGAGACCCGAGAAGGTAT	i1 (2/5)
	CCCCGGGAAGTAATGGGTTTTTGGGATTACCCGTTTGTGGCCAAGAAA-AAGCCCGGTAGAGACCCGAGAAGGTAT	0 (1/5)
M100-12	AGTAATGGGTTTTTGGGATTACCCGTTTGTGGCCAAGAAAAAGCCCGGTAGAGACCCGAGAAGG	WT
	AGTAATGGGTTTTTGGGATTACCC---------------------------------GAGAAGG	d33 (3/7)
	AGTAATGGGTTTTTGGGATTACCCGTTTGTGGCCAAGAAAAAGCCCGGTAGAGACCCGAGAAGG	0 (4/7)
M100-13	AGTAATGGGTTTTTGGGATTACCCGTTTGTGGCCAAGAA-AAAGCCCGGTAGAGACCCGAGAAG	WT
	AGTAATGGGTTTTTGGGATTACCCGTTTGTGGCCAAGAA---------------ACCCGAGAAG	d14 (3/5)
	AGTAATGGGTTTTTGGGATTACCCGTTTGTGGCCAAGAA----GCCCGGTAGAGACCCGAGAAG	d3 (2/5)
M100-14	TTTTGGGATTACCCGTTTGTGGCCAAGAAAAAGCCCGGTAGAGACCCGAGAAGGTATCCGGGTC	WT
	TTTTGGGATTACCCGTTTGT----------------------------------------GGTC	d40 (1/5)
	TTTTGGGATTACCCG----------------------GTAGAGACCCGAGAAGGTATCCGGGTC	d22 (1/5)
	TTTTGGGATTACCCGTTTGTGGCCA-------GCCCGGTAGAGACCCGAGAAGGTATCCGGGTC	d7 (2/5)
	TTTTGGGATTACCCGTTTGTGGCCAAGA--AAGCCCGGTAGAGACCCGAGAAGGTATCCGGGTC	d2 (1/5)
M150-1	TTGGTATCGACCCGAATCGGGAGATTGTTCATTCAAGTCTTTATTCATCTCTTCGTGTTAATCTTCCCCGGGAAGTAATGGGTTTTTGGGATTACCCGTTTGTGGCCAAGAAAAAGCCCGGTAGAGACCCGAGAAGGTATCCGGGTCATGGGGAGGTGTTGAATTATTTGAATGATTTTGCTGTTGATTTTGGGATTATTGGGGTTGTGAGGTTTG	WT
	T---------------------------------------------------------------------------------------------------------------------------------------------------------------------------------------------------------------------TG	d213 (2/5)
	TTGGTATCGACCCGAATCGGGAGATTGTTCATTCAAGTCTTTATTCATCTCTTCGTGTTAATCTTCCCCGGGAAGTAATGGGTTTTTGGGATTACCCG-----------------------------------------TCCGGGTCATGGGGAGGTGTTGAATTATTTGAATGATTTTGCTGTTGATTTTGGGATTATTGGGGTTGTGAGGTTTG	d41 (1/5)
	TTGGTATCGACCCGAATCGGGAGATTGTTCATTCAAGTCTTTATTCATCTCTTCGTGTTAATCTTCCCCGGGAAGTAATGGGTTTTTGGGATTACCCGTTTGTGGCCAAGAAAAAGCCCGGTAGAGACCCGAGAAGGTATCCGGGTCATGGGGAGGTGTTGAATTATTTGAATGATTTTGCTGTTGATTTTGGGATTATTGGGGTTGTGAGGTTTG	0 (2/5)
M150-2	AATGGGTTTTTGGGATTACCCGTTTGTGGCCAAGAAAAAGCCCGGTAGAGACCCGAGAAGGTATCCGGGTCA	WT
	A----------------------------------------------------------------------A	d70 (3/7)
	AATGGGTTTTTGGGATTAC---------------------------------CCGAGAAGGTATCCGGGTCA	d33 (2/7)
	AATGGGTTTTTGGGATTACCCGTTTGTGGCCAAG-AAAAGCCCGGTAGAGACCCGAGAAGGTATCCGGGTCA	d1 (2/7)
M150-3	AGTAATGGGTTTTTGGGATTACCCGTTTGTGGCCAAGA-AAAAGCCCGGTAGAGACCCGAGAAG	WT
	AGTAATGGGTTTTTGGGATTACCCGTTTGT---------------------------------G	d32 (1/6)
	AGTAATGGGTTTTTGGGATT------------------------CCCGGTAGAGACCCGAGAAG	d23 (1/6)
	AGTAATGGGTTTTTGGGATTACCCGTTTGTGGCCAAG----AAGCCCGGTAGAGACCCGAGAAG	d3 (2/6)
	AGTAATGGGTTTTTGGGATTACCCGTTTGTGGCCAAGAAAAAAGCCCGGTAGAGACCCGAGAAG	i1 (2/6)
M150-4	AGTAATGGGTTTTTGGGATTACCCGTTTGTGGCCAAGAA-AAAGCCCGGTAGAGACCCGAGAAG	WT
	AGTAATGGGTTTTTGGGATTACCCGTTTGTGGCCAAG-----AGCCCGGTAGAGACCCGAGAAG	d4 (3/7)
	AGTAATGGGTTTTTGGGATTACCCGTTTGTGGCCAAG----AAGCCCGGTAGAGACCCGAGAAG	d3 (1/7)
	AGTAATGGGTTTTTGGGATTACCCGTTTGTGGCCAAGAAAAAAGCCCGGTAGAGACCCGAGAAG	i1 (1/7)
	AGTAATGGGTTTTTGGGATTACCCGTTTGTGGCCAAGAA-AAAGCCCGGTAGAGACCCGAGAAG	0 (2/7)
M150-5	CCCGTTTGTGGCCAAGAAAAAGCCCGGTAGAGACCCGAGAAGGTATCCGGGTCATGGGGAGGTGTTGAATTATTTGAATGATTTTGCTGTTGATTTTGGGATTATTG	WT
	C--------------------------------------------------------------------------------------------------------TG	d104 (1/6)
	CCCGTTTGTGGCCAA-------------------------------------------GAGGTGTTGAATTATTTGAATGATTTTGCTGTTGATTTTGGGATTATTG	d43 (1/6)
	CCCG---------------------------------AGAAGGTATCCGGGTCATGGGGAGGTGTTGAATTATTTGAATGATTTTGCTGTTGATTTTGGGATTATTG	d33 (1/6)
	CCCGTTTG-----------------GGTAGAGACCCGAGAAGGTATCCGGGTCATGGGGAGGTGTTGAATTATTTGAATGATTTTGCTGTTGATTTTGGGATTATTG	d17 (1/6)
	CCCGTTTGTGGCCAAGAAAAAGCCCGGTAGAGACCCGAGAAGGTATCCGGGTCATGGGGAGGTGTTGAATTATTTGAATGATTTTGCTGTTGATTTTGGGATTATTG	0 (2/6)
M150-6	AGTAATGGGTTTTTGGGATTACCCGTTTGTGGCCAAGAA-AAAGCCCGGTAGAGACCCGAGAAG	WT
	AGTAATGGGTTTTTGGGATTACCCGTTTGTGGCCAAGAA--AAGCCCGGTAGAGACCCGAGAAG	d1 (2/7)
	AGTAATGGGTTTTTGGGATTACCCGTTTGTGGCCAAGAAGAAAGCCCGGTAGAGACCCGAGAAG	i1 (5/7)
M150-7	AGTAATGGGTTTTTGGGATTACCCGTTTGTGGCCAAG-AAAAAGCCCGGTAGAGACCCGAGAAG	WT
	AGTAATGGGTTTTTGGGATTACCCGTTTGTGGC----------GCCCGGTAGAGACCCGAGAAG	d9 (2/6)
	AGTAATGGGTTTTTGGGATTACCCGTTTGTGGCCAAG---AAAGCCCGGTAGAGACCCGAGAAG	d2 (1/6)
	AGTAATGGGTTTTTGGGATTACCCGTTTGTGGCCAAGAAAAAAGCCCGGTAGAGACCCGAGAAG	i1 (3/6)
M150-8	CCCGGGAAGTAATGGGTTTTTGGGATTACCCGTTTGTGGCCAAGAAAA-AGCCCGGTAGAGACCCGAGAAGGTATCCGGGTCATGGGG	WT
	C----------------------------------------------------------------------------GGGTCATGGGG	d75 (1/6)
	CCCGGGAAGTAATGGG-----------------------------------------------------------------------G	d70 (1/6)
	CCCGGGAAGTAATGGGTTTTTGGGATTACCCGTTTGTGGCCAAG-------CCCGGTAGAGACCCGAGAAGGTATCCGGGTCATGGGG	d6 (1/6)
	CCCGGGAAGTAATGGGTTTTTGGGATTACCCGTTTGTGGCCAAGAAA--AGCCCGGTAGAGACCCGAGAAGGTATCCGGGTCATGGGG	d1 (1/6)
	CCCGGGAAGTAATGGGTTTTTGGGATTACCCGTTTGTGGCCAAGAAAAAAGCCCGGTAGAGACCCGAGAAGGTATCCGGGTCATGGGG	i1 (2/6)
M150-9	AGTAATGGGTTTTTGGGATTACCCGTTTGTGGCCAAGAAAAAGCCCGGTAGAGACCCGAGAAGG	WT
	AGTAATGGGTTTTTGGGATTACCCGTTTGTGG----------GCCCGGTAGAGACCCGAGAAGG	d10 (1/7)
	AGTAATGGGTTTTTGGGATTACCCGTTTGTGGCCAAGA--AAGCCCGGTAGAGACCCGAGAAGG	d2 (1/7)
	AGTAATGGGTTTTTGGGATTACCCGTTTGTGGCCAAGA-AAAGCCCGGTAGAGACCCGAGAAGG	d1 (3/7)
	AGTAATGGGTTTTTGGGATTACCCGTTTGTGGCCAAGAAAAAGCCCGGTAGAGACCCGAGAAGG	0 (2/7)
M200-1	TTTGGGATTACCCGTTTGTGGCCAAGAAAAAGCCCGGTAGAGACCCGAGAAGGTATCCGGGTCA	WT
	TTTGGGATTACCCGTTTGTGGCCAAGAA---------TAG----CCGAGA----ATCCGGGTCA	d17 (2/5)
	TTTGGGATTACCCGTTTGTGGCCAAGAA--AGCCCGGTAGAGACCCGAGAAGGTATCCGGGTCA	d2 (1/5)
	TTTGGGATTACCCGTTTGTGGCCAAGAAAAAGCCCGGTAGAGACCCGAGAAGGTATCCGGGTCA	0 (2/5)
M200-2	AATCTTCCCCGGGAAGTAATGGGTTTTTGGGATTACCCGTTTGTGGCCAAGAAAAAGCCCGGTA	WT
	AATCTTCCC--------------------------------------------------CGGTA	d50 (1/6)
	AATCTTCCCCGGGAAGTAATGGGTTTTTGGGATTACCCGTTTGTGGCCAAGAA-AAGCCCGGTA	d1 (1/6)
	AATCTTCCCCGGGAAGTAATGGGTTTTTGGGATTACCCGTTTGTGGCCAAGAAAAAGCCCGGTA	0 (4/6)
M200-3	TTGGGATTACCCGTTTGTGGCCAAGAAAA-AGCCCGGTAGAGACCCGAGAAGGTATCCGGGTCATG	WT
	T----------------------------------------------------------------G	d63 (2/7)
	TTGGGATTACCCGTTTGTGGC-----------------------------------------CATG	d40 (1/7)
	TGGGGATTACCCG-----------------------GTAGAGACCCGAGAAGGTATCCGGGTCATG	d22 (1/7)
	TTGGGATTACCCGTTTGTGGCC-------AAGCCCGGTAGAGACCCGAGAAGGTATCCGGGTCATG	d6 (1/7)
	TTGGGATTACCCGTTTGTGGCCAAGAAAAAAGCCCGGTAGAGACCCGAGAAGGTATCCGGGTCATG	i1 (1/7)
	TTGGGATTACCCGTTTGTGGCCAAGAAA-AAGCCCGGTAGAGACCCGAGAAGGTATCCGGGTCATG	0 (1/7)
M200-4	AGTAATGGGTTTTTGGGATTACCCGTTTGTGGCCAAGAAAAAGCCCGGTAGAGACCCGAGAAGG	WT
	AGTAATGGGTTTTTGGGATTACCCGTTTGTGGCCAAGA---AGCCCGGTAGAGACCCGAGAAGG	d3 (1/6)
	AGTAATGGGTTTTTGGGATTACCCGTTTGTGGCCAAGA-AAAGCCCGGTAGAGACCCGAGAAGG	d1 (2/6)
	AGTAATGGGTTTTTGGGATTACCCGTTTGTGGCCAAGAAAAAGCCCGGTAGAGACCCGAGAAGG	0 (3/6)
*Wild type (WT) genomic sequences and SgRNA provided for comparison. sgRNA sequence is underlined. PAM sequence is surrounded by green boxes. The bold C indicates the roots regeneration under no stress. The number associated with bold M indicates the concentration of mannitol (mM). The number associated with bold N indicates the concentration of sodium chloride (mM). All sequences are followed by…
