# Supplementary material for: Salt and osmotic stress can improve the editing efficiency of CRISPR/Cas9-mediated genome editing system in potato
Source: PeerJ. 2023 Jul 31;11:e15771. doi: 10.7717/peerj.15771 (PMC10399558; doi:10.7717/peerj.15771)
Supplement: Supplemental Information 2 — *d#, # of bp deleted at target StLike3; i#, # of bp inserted at target StLike3; r#, # of bp replaced at target StLike3; wt, wild-type sequence with no mutation detected. The number before i, r, d, wt represents the number of clones of the mutation. [file peerj-11-15771-s002.xlsx]

## Sheet: Sheet1
Supplemental table S2.
The genotypes of CRISPR/cas9‐induced mutations identified in regeneration roots
Lines	Zygosity	Genotype
C-1	Chimera	2d14, 1d4, 2d1
C-2	Chimera	1d5, 1d2, 4d1, 1wt
C-3	Chimera	1d4, 4d3,1i1, 1wt
C-4	Chimera	1d3, 1i1, 4wt
C-6	Chimera	2d3, 2d1, 3i1
C-8	Bi-allelic	3d3, 4i1
C-12	Chimera	1d14, 2d4, 3d1,1wt
C-13	Chimera	2d48, 1d21, 1d3, 1wt
C-15	Chimera	2d33, 2d23, 1d3
C-16	Chimera	4d61, 1d45, 1d44, 1wt
C-17	Chimera	1d16, 1d3, 3wt
C-18	Chimera	1d23, 1d4, 1d2, 2i1
C-19	Chimera	1d117, 2d23, 1d1, 2wt
C-21	Bi-allelic	5d61, 2d1
C-22	Chimera	2d62, 2d19, 1d6, 2d1
C-23	Chimera	1d8, 1d6, 2d3, 1d2, 2wt
C-24	Chimera	1d33, 2d3, 1i1, 1wt
C-25	Chimera	2d6, 2i1, 2wt
N10-1	Heterozygous	2d2, 3wt
N10-2	Chimera	1d7, 1d4, 1d3, 1i1, 1wt
N10-3	Bi-allelic	3d7, 2d2
N10-4	Chimera	3d3, 1d2, 1wt
N10-5	Homozygous	5i1
N10-6	Bi-allelic	2d46, 4d2
N10-7	Bi-allelic	5d3, 2i1
N10-8	Chimera	2d97, 2d3, 1d2
N10-9	Chimera	1d33, 1d13, 1d3, 2wt
N10-10	Bi-allelic	3d3, 2d1
N10-11	Chimera	2d8, 2i1, 1wt
N10-12	Bi-allelic	4d63, 3d1
N10-14	Chimera	1d21, 1d7, 2d2, 1i1
N10-15	Chimera	2d4, 1d3, 1i1, 1wt
N10-17	Chimera	1d63, 1d4, 2i1, 1wt
N10-19	Chimera	1d4, 1d3, 3wt
N20-1	Bi-allelic	3d46, 2d2
N20-2	Chimera	1d11, 1d7, 1i1, 2wt
N20-3	Chimera	2d40, 1d7, 2d3
N20-4	Bi-allelic	2d3, 3i1
N20-5	Chimera	1d23, 1d22, 2d16, 1d6
N20-6	Heterozygous	2d6, 3wt
N20-7	Chimera	2d40, 2d2, 1wt
N20-8	Bi-allelic	2d63, 3d2
N20-9	Bi-allelic	3d10, 3d3
N20-10	Chimera	1d61, 2d1, 2wt
N20-11	Heterozygous	4d3, 1wt
N20-12	Chimera	1d23, 2d2, 1i1, 1wt
N20-13	Chimera	1d3, 1i1, 3r1
N30-1	Chimera	1d23, 2d6, 2wt
N30-2	Chimera	2d87, 2d9, 1i1
N30-3	Chimera	2d3, 2d2, 1wt
N30-4	Chimera	3d38, 3i1, 1wt
N30-5	Chimera	1d7, 2d3, 1i1, 1wt
N30-6	Chimera	2d94, 3d40, 1d3, 1wt
N30-7	Chimera	2d3, 1d2, 1i1, 1i2
N30-8	Chimera	1d9, 1d2, 1d1, 2i1
N30-9	Chimera	1d3, 1d1, 1i1, 3wt
N30-10	Chimera	1d6, 1d3, 2i1. 1wt
N30-11	Chimera	1d24, 1d4, 2d1, 1i1
N30-12	Chimera	2d36, 1d8, 1d3, 1wt
N30-13	Chimera	1d7, 1d6, 2d3, 1d2
N50-1	Chimera	1d23, 2d11, 1d3, 1d1
N50-2	Chimera	1d7, 1d3, 1i1, 2wt
N50-3	Chimera	1d6, 1d1, 3i1
N50-4	Chimera	1d7, 3d3, 2d2
N50-5	Chimera	1d4, 2d3, 1d1, 1i1
N50-6	Chimera	3d2, 1i1, 1wt
N50-7	Chimera	2d81, 1d5, 1d2, 1d1
M50-1	Chimera	1d40, 1d5, 2d3, 1d1, 1i1
M50-2	Chimera	1d64, 1d4, 1d1, 3i1
M50-4	Chimera	1d24, 1d12, 1d6, 1i1
M50-5	Heterozygous	1i1, 4wt
M50-6	Chimera	3d26, 1d1, 1i1, 1wt
M50-7	Chimera	3i2, 1i1, 2wt
M50-9	Chimera	1d48, 1d7, 3d1, 1wt
M50-10	Heterozygous	2d2, 4wt
M50-11	Chimera	1d90, 1d3, 3wt
M50-12	Chimera	2d48, 2d10, 1d4
M50-13	Chimera	1d36, 2d25, 3wt
M50-14	Bi-allelic	2d2, 3i1
M50-15	Chimera	1d23, 1d4, 2d2, 1i1, 1i2
M50-16	Chimera	1d39, 1d8, 2d1, 2wt
M50-17	Chimera	1d3, 1d2, 1d1, 2wt
M50-18	Chimera	1d4, 2d3, 1d1, 2wt
M50-19	Chimera	2d158, 1d2, 2d1, 1i1
M50-21	Chimera	1d63, 2d22, 1d21, 1d11
M100-1	Heterozygous	3d2, 2wt
M100-2	Chimera	1d11, 1d4, 1d2, 2d1, 1i1
M100-3	Bi-allelic	3d3, 3d1
M100-4	Chimera	1d4, 4d2, 2wt
M100-5	Chimera	1d40, 1d33, 1d4, 1d2, 2wt
M100-6	Chimera	1d21, 2d3, 2wt
M100-7	Chimera	1d40, 1d23, 2d5, 1wt
M100-8	Chimera	2d4, 2d2, 1d1, 1i1
M100-9	Chimera	2d56, 2d6, 2i1
M100-10	Chimera	1d23, 2d2, 2wt
M100-11	Chimera	2d73, 2i1, 1wt
M100-12	Heterozygous	3d33, 4wt
M100-13	Bi-allelic	3d14, 2d3
M100-14	Chimera	1d40, 1d22, 2d7, 1d2
M150-1	Chimera	2d213, 1d41, 2wt
M150-2	Chimera	3d70, 2d33, 2d1
M150-3	Chimera	1d32, 1d23, 2d3, 2i1
M150-4	Chimera	3d4, 1d3, 1i1,2wt
M150-5	Chimera	1d104, 1d43, 1d33, 1d17, 2wt
M150-6	Bi-allelic	2d1, 5i1
M150-7	Chimera	2d9, 1d2, 3i1
M150-8	Chimera	1d75, 1d70, 1d6, 1d1, 2i1
M150-9	Chimera	1d10, 1d2, 3d1, 2wt
M200-1	Chimera	2d17, 1d2, 2wt
M200-2	Chimera	1d50, 1d1, 4wt
M200-3	Chimera	2d63, 1d40, 1d22, 1d6, 1i1, 1wt
M200-4	Chimera	1d3, 2d1, 3wt
*d#, # of bp deleted at target StLike3; i#, # of bp inserted at target StLike3; r#, # of bp replaced at target StLike3; wt, wild-type sequence with no mutation detected. The number before i, r, d, wt represents the number of clones of the mutation.
