# Supplementary material for: Salt and osmotic stress can improve the editing efficiency of CRISPR/Cas9-mediated genome editing system in potato
Source: PeerJ. 2023 Jul 31;11:e15771. doi: 10.7717/peerj.15771 (PMC10399558; doi:10.7717/peerj.15771)
Supplement: Supplemental Information 4 [file peerj-11-15771-s004.xlsx]

## Sheet: Sheet1
Treatments (mM)	Total	Mutation	Wild type	Mutation efficiency(%)
Control	148	92	56	62.1622
N10	104	72	32	69.2308
N20	66	56	10	84.8485
N30	70	59	11	84.2857
N50	36	33	3	91.6667
M50	119	74	45	62.1849
M100	79	63	16	79.7468
M150	57	49	8	85.9649
M200	24	14	10	58.3333
