# Supplementary material for: Salt and osmotic stress can improve the editing efficiency of CRISPR/Cas9-mediated genome editing system in potato
Source: PeerJ. 2023 Jul 31;11:e15771. doi: 10.7717/peerj.15771 (PMC10399558; doi:10.7717/peerj.15771)
Supplement: Supplemental Information 5 [file peerj-11-15771-s005.xlsx]

## Sheet: Sheet1
Treatments (mM)	No. of roots examined	null-mutation
		Homozygous	Bi-allelic	Chimeric	number	Ratio（%）
Control	25	0	2	5	7	28
N10	19	1	5	2	8	42.1053
N20	13	0	4	3	7	53.8462
N30	13	0	0	5	5	38.4615
N50	7	0	0	5	5	71.4286
M50	21	0	0	8	8	38.0952
M100	14	0	2	4	6	42.8571
M150	9	0	1	4	5	55.5556
M200	4	0	0	0	0	0
