# Supplementary material for: Salt and osmotic stress can improve the editing efficiency of CRISPR/Cas9-mediated genome editing system in potato
Source: PeerJ. 2023 Jul 31;11:e15771. doi: 10.7717/peerj.15771 (PMC10399558; doi:10.7717/peerj.15771)
Supplement: Supplemental Information 7 [file peerj-11-15771-s007.xlsx]

## Sheet: Sheet1
Salt and osmotic stress (mM)		No. of explants	No. of roots proliferation	Root induction efficiency（%）	No. of Transformant	Transformant efficiency（%）	Positivity rates （%）
Control	0	54	163	301.85	25	46.3	15.34
NaCl	10	54	122	225.93	19	35.19	15.57
	20	54	81	150	13	24.07	16.05
	30	54	25	46.3	13	24.07	52
	50	54	11	20.37	7	12.96	63.64
Mannitol	50	54	133	246.3	21	38.89	15.79
	100	54	81	150	14	25.93	17.28
	150	54	35	64.81	9	16.67	25.71
	200	54	10	18.52	4	7.41	40
