# Supplementary material for: Salt and osmotic stress can improve the editing efficiency of CRISPR/Cas9-mediated genome editing system in potato
Source: PeerJ. 2023 Jul 31;11:e15771. doi: 10.7717/peerj.15771 (PMC10399558; doi:10.7717/peerj.15771)
Supplement: Supplemental Information 8 [file peerj-11-15771-s008.xlsx]

## Sheet: Sheet1
Stresses	No. of	No. of	Mutation	Homozygous		Bi-allelic		Heterozygous		Chimeric
(mM)	roots examined	Roots with Mutations	Rate
			（%）	Number	Ratio（%）	Number	Ratio（%）	Number	Ratio（%）	Number	Ratio（%）
Control	25	18	72	0	0	2	11.11	0	0	16	88.89
N10	19	16	84.21	1	6.25	5	31.25	1	6.25	9	56.25
N20	13	13	100	0	0	4	30.77	2	15.38	7	53.85
N30	13	13	100	0	0	0	0	0	0	13	100
N50	7	7	100	0	0	0	0	0	0	7	100
M50	21	18	85.21	0	0	1	5.56	2	11.11	15	83.33
M100	14	14	100	0	0	2	14.29	2	14.29	10	71.43
M150	9	9	100	0	0	1	11.11	0	0	8	88.89
M200	4	4	100	0	0	0	0	0	0	4	100
